# Supplementary material for: ESI mutagenesis: a one-step method for introducing mutations into bacterial artificial chromosomes
Source: Life Sci Alliance. 2020 Dec 7;4(2):e202000836. doi: 10.26508/lsa.202000836 (PMC7756954; doi:10.26508/lsa.202000836)
Supplement: Supplementary file 1 [file LSA-2020-00836_TableS1.xlsx]

## Sheet: Sheet1
Gene Name	Sequence information																qPCR
	Organism	Ensembl ID	BAC Clone ID	Parental MCB#	Tag	Mutated MCB#	Mutation	siRNA sequence	Initial sequence ( | indicates the presnece of a natural intron which sequence is not displayed)	sDS	sAs	Modified sequence ( | indicates the presnece of a synthetic intron which sequence is not displayed)	Cassette insertion (EnsembL #)	Distance to Exon/Intron border	Targeted Exon Size	Synthetic Intron	Parental MCB#	Mutated MCB#	siRNA	siRNA treatment	qPCR Primer Fw	qPCR Primer Re
ANLN	human	ENSG00000011426	RP11-469D14	2371	LAP	7228	siRNA Resis	GGUCUAUGACUCAUGCUAAtt	AAG GTCTATGACTCATGCTAA GCGAGCTAGACAGCCACTTTCAGAA	CAG	A	CAG | AAGCATGACACACGCAAAGCGAGCTAGACAGCCACTTTCAGAA	Insertion within exon 2	77|77	154	pGK-BSD / gb2-Nat	2371	7228_siRESIS_cl1	Ambion siRNA: no. s28982 (GGUCUAUGACUCAUGCUAAtt)	24 hours	ggacaagGTCCCCTTTTTATC	gaacacaccatcttcgatgc
AURKB	human	ENSG00000178999	CTD-2604F21	7019	LAP	7467	siRNA Resis	CCUGCGUCUCUACAACUAUtt	CCCACCTGCA | CCATCCCAAC ATCCTGCGTCTCTACAACTAT TTTTATGA	CAG	A	CCCACCTGCA CCATCCCAAC ATTCTCAG | ATTGTATAATTAC TTTTATGA	Synthetic intron replaces intron 5-6			pGK-BSD / gb2-Nat	7019	7467_siRESIS_cl2	Ambion siRNA: CCUGCGUCUCUACAACUAUtt	24 hours	ACCTGCAccatcccaacatc	TGCCAACTCCTCCATGATcg
MASTL	human	ENSG00000120539	RP11-21D10	3125	LAP	7231	siRNA Resis	CAGGTCCAAGCTGAGAGAGAT	TATGACTCATCAGGTCCAA CAAGCTGAGAGAGAT GCACTGGCA	CAG	G	TATGACTCATCAAGTGCAG | GCAGAACGGGAC GCACTGGCACTA	Insertion within exon 2	51 | 87	138	pGK-BSD / gb2-Nat	3125	7231_siRESIS_cl2	Ambion siRNA: no. 1109 (CAGGTCCAAGCTGAGAGAGAT)	24 hours	cctgtatgccacatcagACC	GGCCCTGCCTAGTAACAGC
PPP1CB	human	ENSG00000213639	HS.E083.B01	6579	NLAP	7242	siRNA Resis	GAUCUUCUGUUGUCAUGGAtt	TGGATGAGAAGATCTTCTGTTGTCATGGAG |	GAG	G	TGGATGAGAAAATATTTTGCTGCCACGGAG |	Targets the begning of intron 4-5			pGK-BSD / gb2-Nat	6579	7242_siRESIS_cl3	Ambion siRNA: s10933 GAUCUUCUGUUGUCAUGGAtt	48 hours	tgtcatggagGATTGTCACCAG	cattttctccccagccttgc
PRPF8	human	ENSG00000174231	RP11-60C18	2793	LAP	7230	siRNA Resis	AGUUCCGCCAUGACAAAAGtt	ACCAACAGGAAGTTCCGCCATGACAAAAGGGTTTACTTGGG |	GGG	T	ACCAACAGGAAATTTAGGCACGATAAGCGGGTTTACTTGGG |	Targets the beginning intron 2-3			pGK-BSD / gb2-Nat	2793 (Hela-TDS)	7230_siRESIS_cl2	Ambion siRNA: no. 241490 (AGUUCCGCCAUGACAAAAGtt)	48 hours	gacaaccaagcccatcaacg	CTGTCTTCCACTTAGCCAActg
WEE1	human	ENSG00000166483	RP11-760M21	4080	LAP	7236	siRNA Resis	CAUCUCGACUUAUUGGAAAtt	AGTAATAGAA CATCTCG ACTTATTGGAAA GAAAATGAAC	CAG	G	AGTAATAGAA CTAGCAG | GTTGATCGGCAA GAAAATGAAC	Insertion within exon 11 (last one)	105 | 1432	1537	pGK-BSD / gb2-Nat	4080	7236_siRESIS_cl2	Ambion siRNA: CAUCUCGACUUAUUGGAAAtt	24 hours	TTGTAATGgtggaagtttagctg	atgaatatacctcaagcctcgg
ACTN4	mouse	ENSMUSG00000054808	RP23-375C17	3917	LAP	7977	siRNA Resis	CCCCCAGATCATCAACTCCAA	ACTGTTACCCCCCAGATCATCAACTCCAAGTGGGAGAAG	AAG	G	ACTGTTACACCACAAATTATTAATAGTAAGTGGGAGAAG |	Replace intron 15-16			pGK-BSD / gb2-Nat
BUB1	human	ENSG00000169679	RP11-625K21	2334	LAP	7013	siRNA Resis	GGUUGCCAACACAAGUUCUTT	| GGTGTGAAACACATAA GGTTGCCAACACAAGTTCTTT TCACACAACT	AAG	G	| GGTGTGAAACACATAA AGTGGCTAATACCTCCAGCTT TCACACAACT	Targets the end of intron 10-11			pGK-BSD / gb2-Nat
CEP135	human	ENSG00000174799	RP11-602K22	3745	LAP	7233	siRNA Resis	GAUCUAGAGAAAUCGCUUUtt	AAGTAGGAAG ATCTAGAGAAATCGCTTT TAAGGAAAAC	CAG	G	AAGTAGGCAG | GAGCCGCGAGATTGCCTT TAAGGAAAAC	Insertion within exon 19	96 | 73	169	pGK-BSD / gb2-Nat
CHMP4B	human	ENSG00000101421	HS.E046.A21	6847	NLAP	7247	siRNA Resis	AGAAAGAAGAGGAGGACGAtt	TCAAAACCCG | CCAAGA AGAAAGAAGAGGAGGACGA CGACATGAAG	CAG	G	TCAAAACCAG | CCAAGA AAAAGGAGGAAGAAGATGA CGACATGAAG	Synthetic intron replaces intron 4-5			pGK-BSD / gb2-Nat
GTSE1	human	ENSG00000075218	RP11-1152E11	NA	LAP	NA	SxIP -> SxNN	NA	TGTGTCAGCCTTGCCCACACCCGCCAGCCG GCGCTGCTCTGGCCTTCCACCGATGACCC	CAG	G	TGTGTCAGCCAATAACACACCCGCCAGCAG | GCGCTGCTCTGGCAATAAC CCGATGACCC	Into exon 9	102 | 117	219	pGK/gb2-Neo
AURKA	human	ENSG00000087586	RP11-158O17	2476	LAP	7018	siRNA Resis	GAGUCUACCUAAUUCUGGAtt	ATGCTACCAG | AGTCTACCTAATTCTGGAATATGCACCA	CAG	G	ATGCTACCAG | GGTGTATTTGATCCTTGA ATATGCACCA	Into exon 6	48 | 91	139	pGK-BSD / gb2-Nat
Table S1. Sequence and construction details of ESI-modified genes. For each modified gene, the parental BAC clone number, original and mutated sequences, and positional information of artificial introns is provided. qPCR primers and conditions from Figure 3A are also listed.
